# Supplementary material for: Understanding cytotoxicity induction by plumbagin in pancreatic ductal adenocarcinoma using network pharmacology, bioinformatic and in-vitro study
Source: Research Square preprint supplement (doi:10.21203/rs.3.rs-8470677/v1), 2026-01-14
Supplement: Supplementary file 1 [file d07698035879351bf28205e6.docx]

**Understanding cytotoxicity induction by plumbagin in pancreatic ductal adenocarcinoma using network pharmacology, bioinformatic and *in-vitro* study**

**(Running heading: Mechanistic role of Plumbagin in PDAC therapeutics)**

**JOURNAL- CYTOTECHNOLOGY**

**SUPPLEMENTARY FIGURES**

**Orcid IDs:**

**Shruti Gupta -** 0000-0002-4934-4061

**Khushhal Rathore-** 0009-0007-7063-4075

**Kiran Kumar Tejavath –** 0000-0001-7876-421X

**Fig. S1**


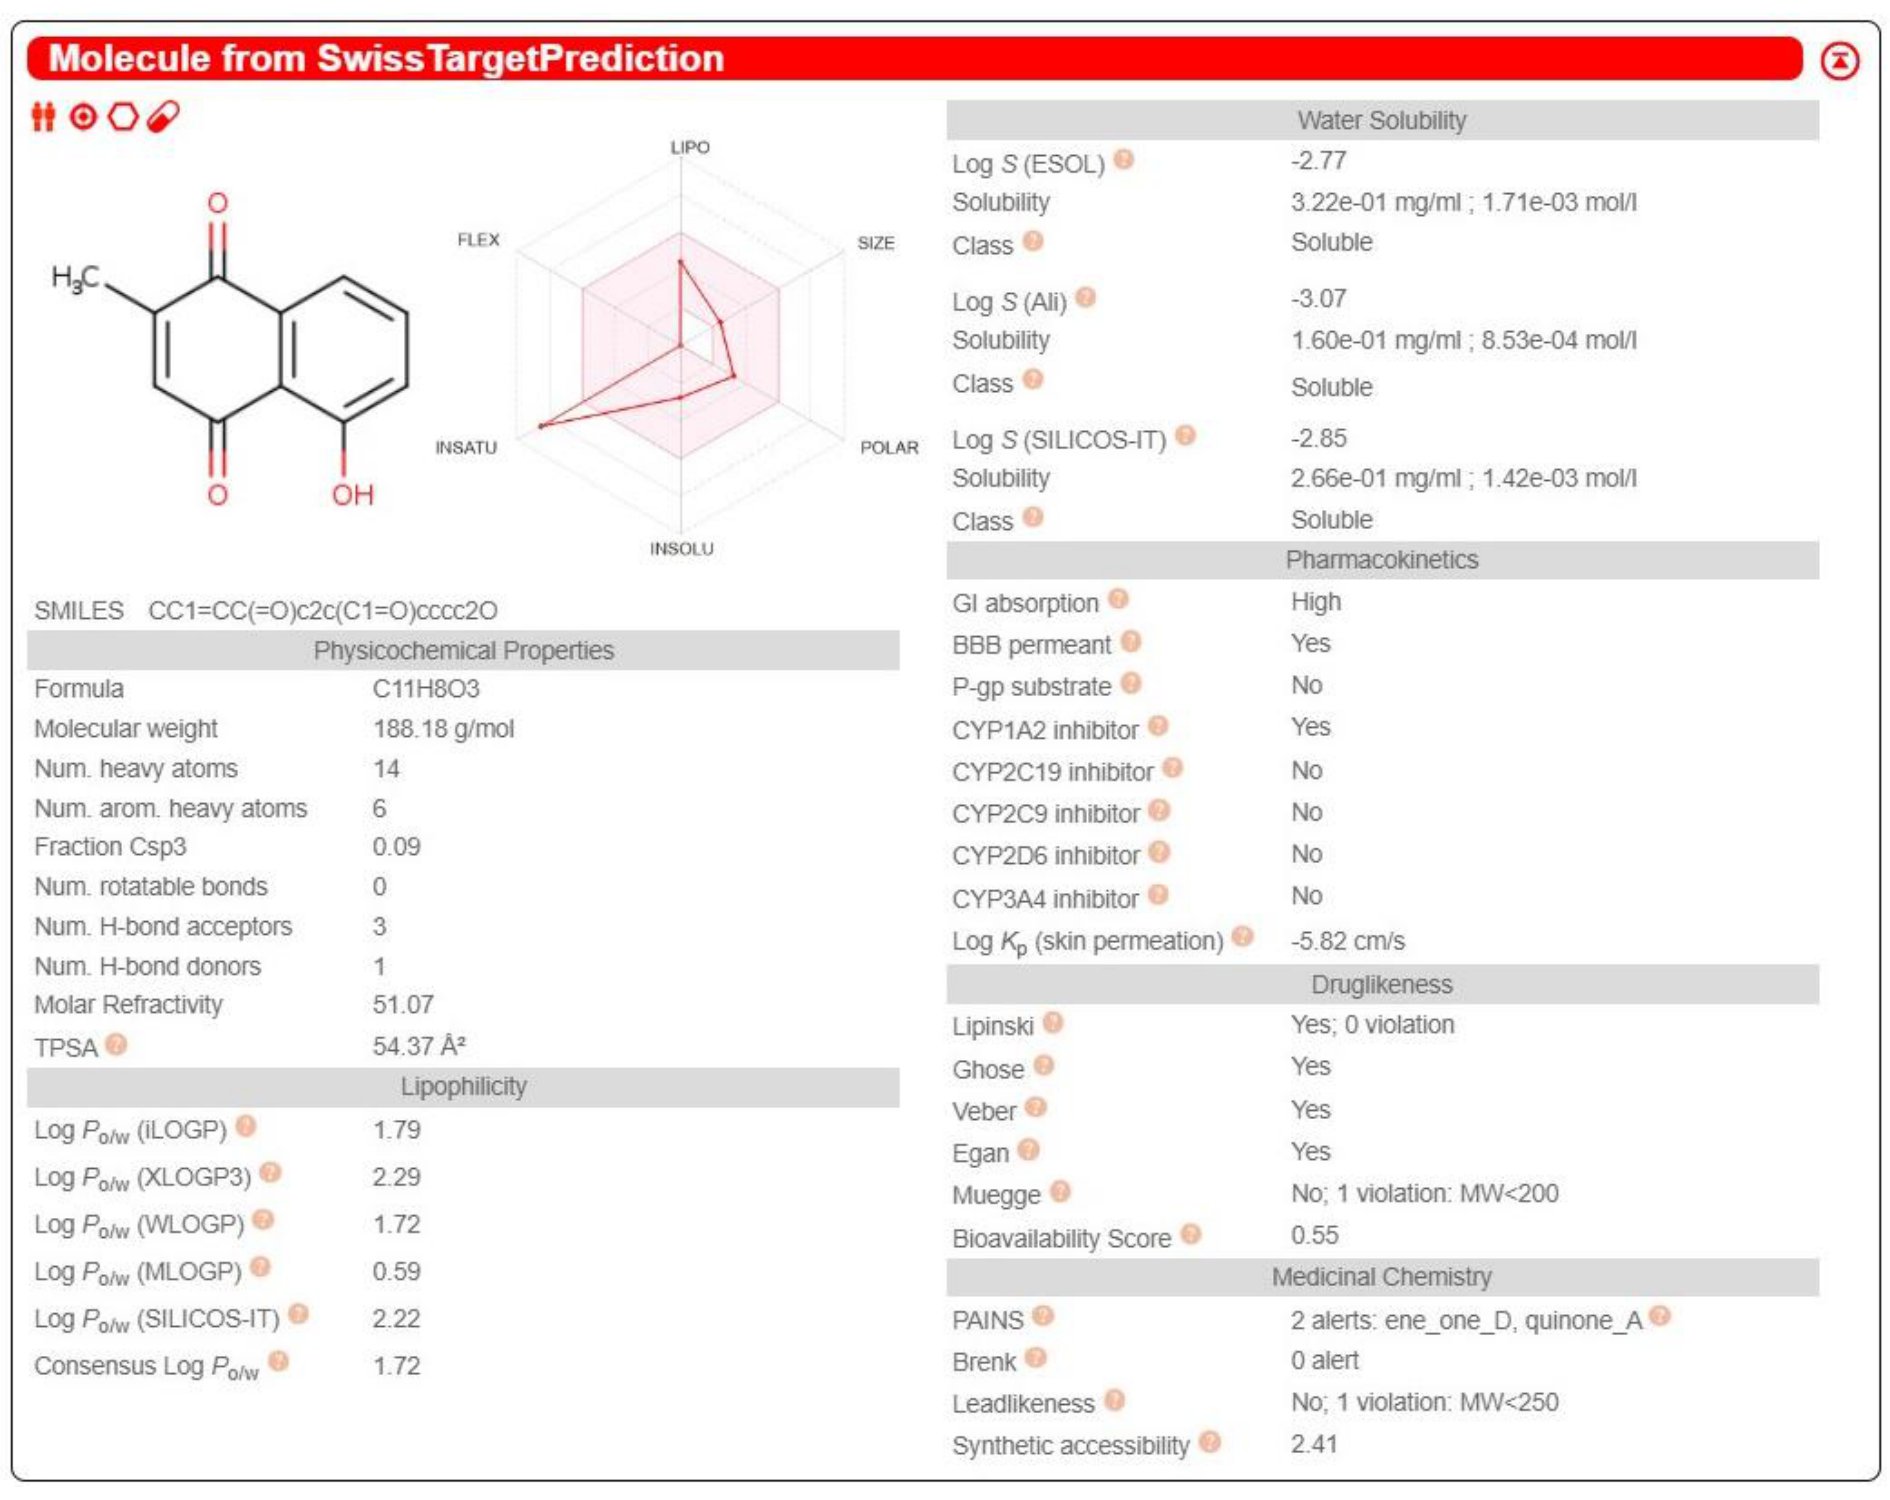


**Fig. S2**


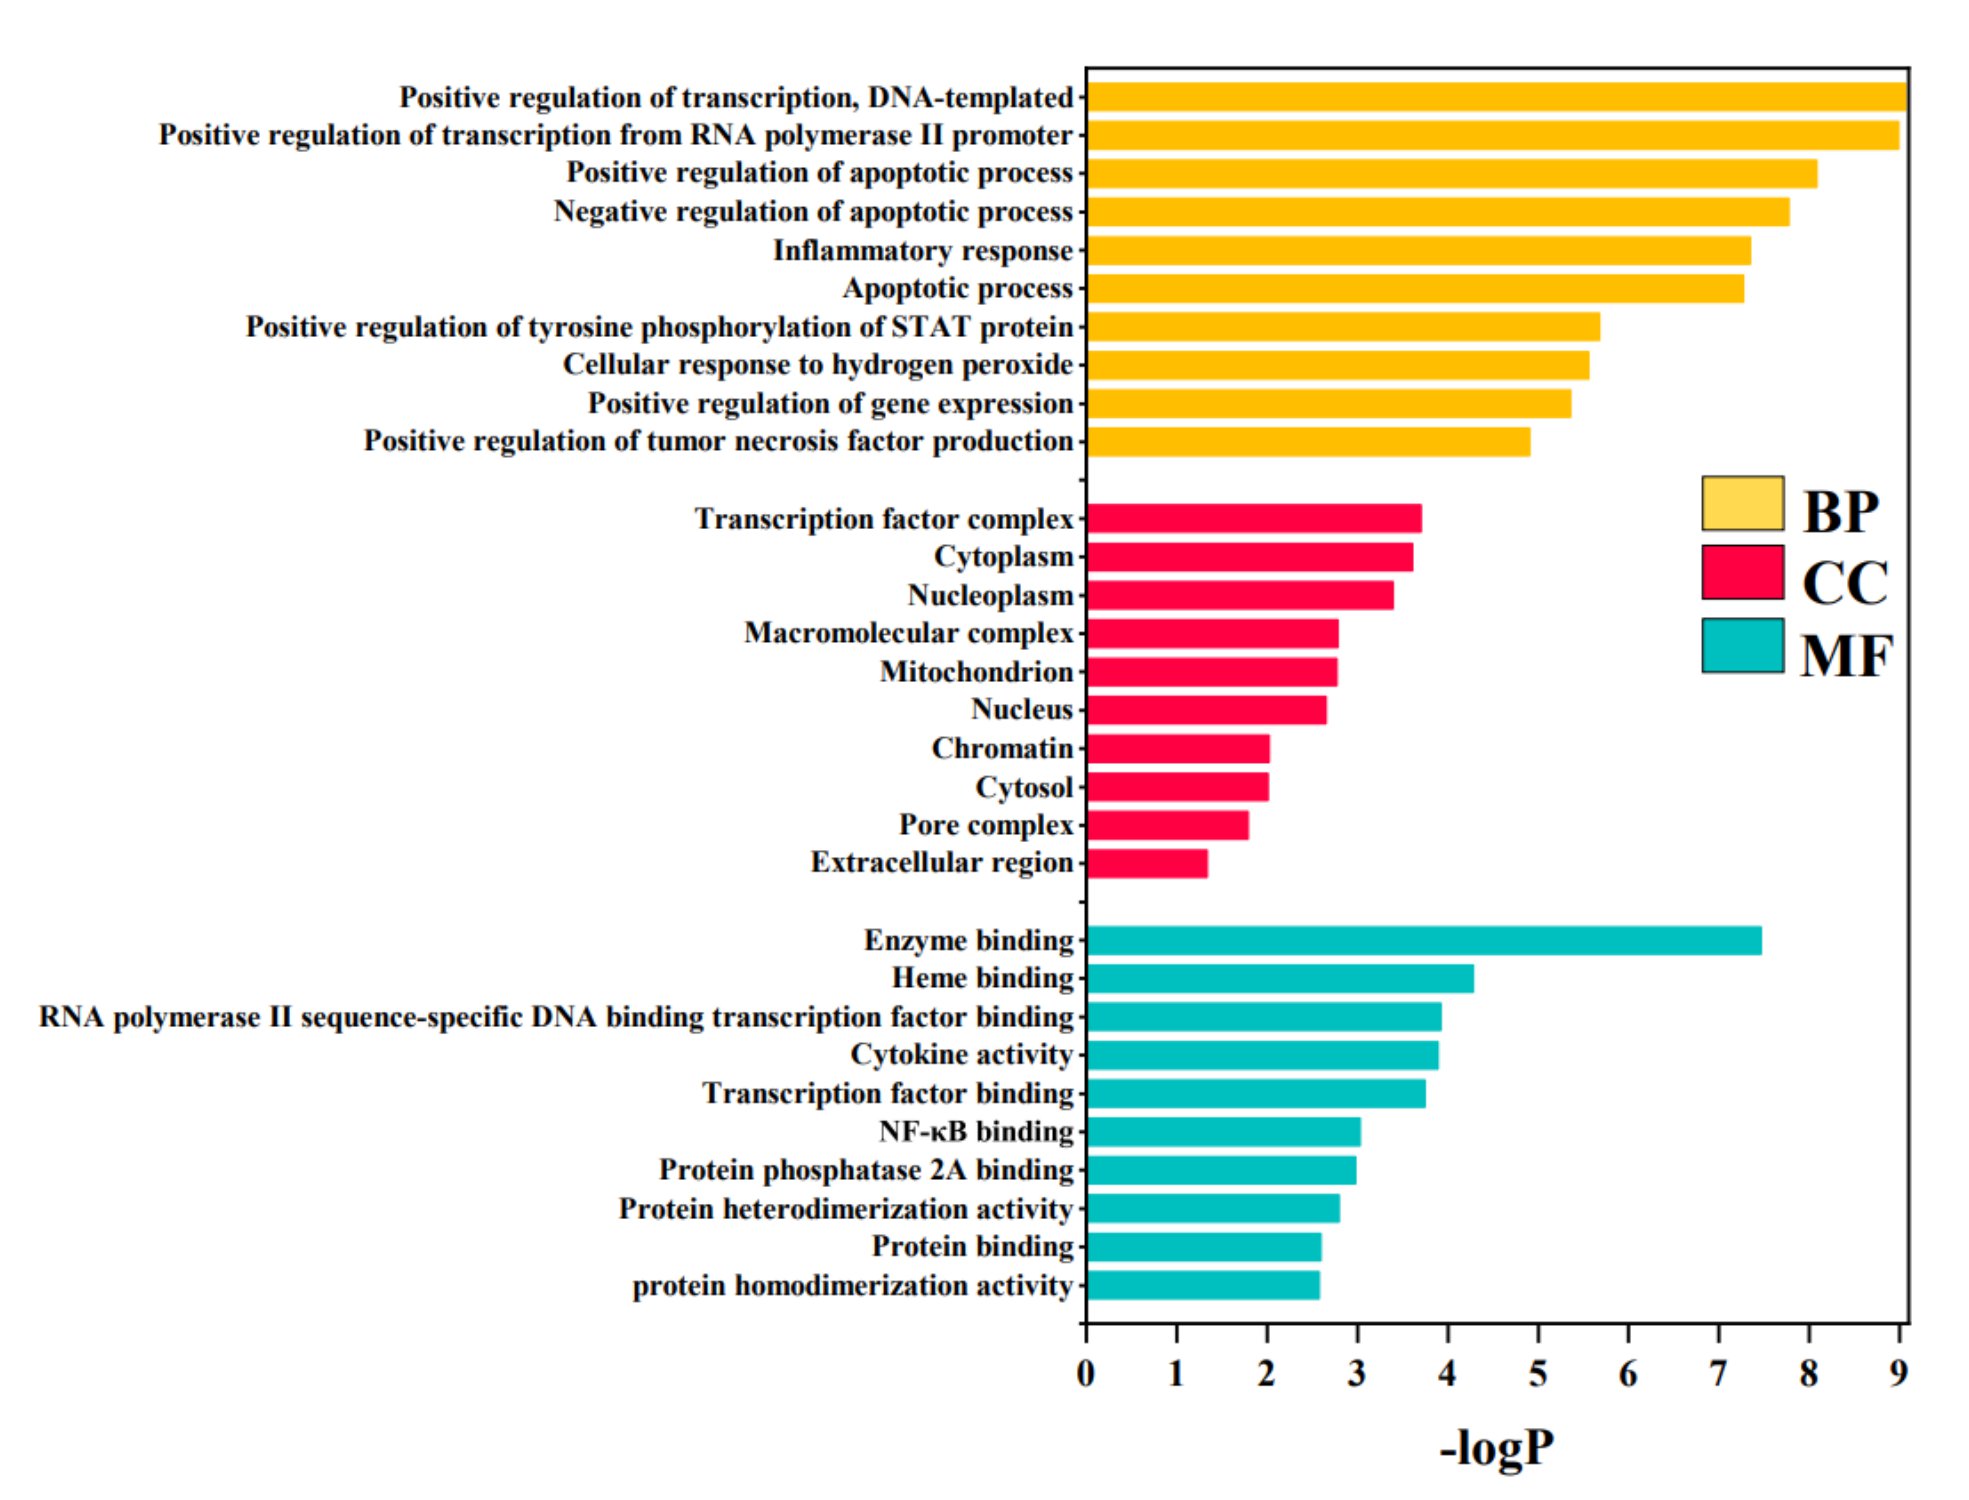


**Fig. S3**


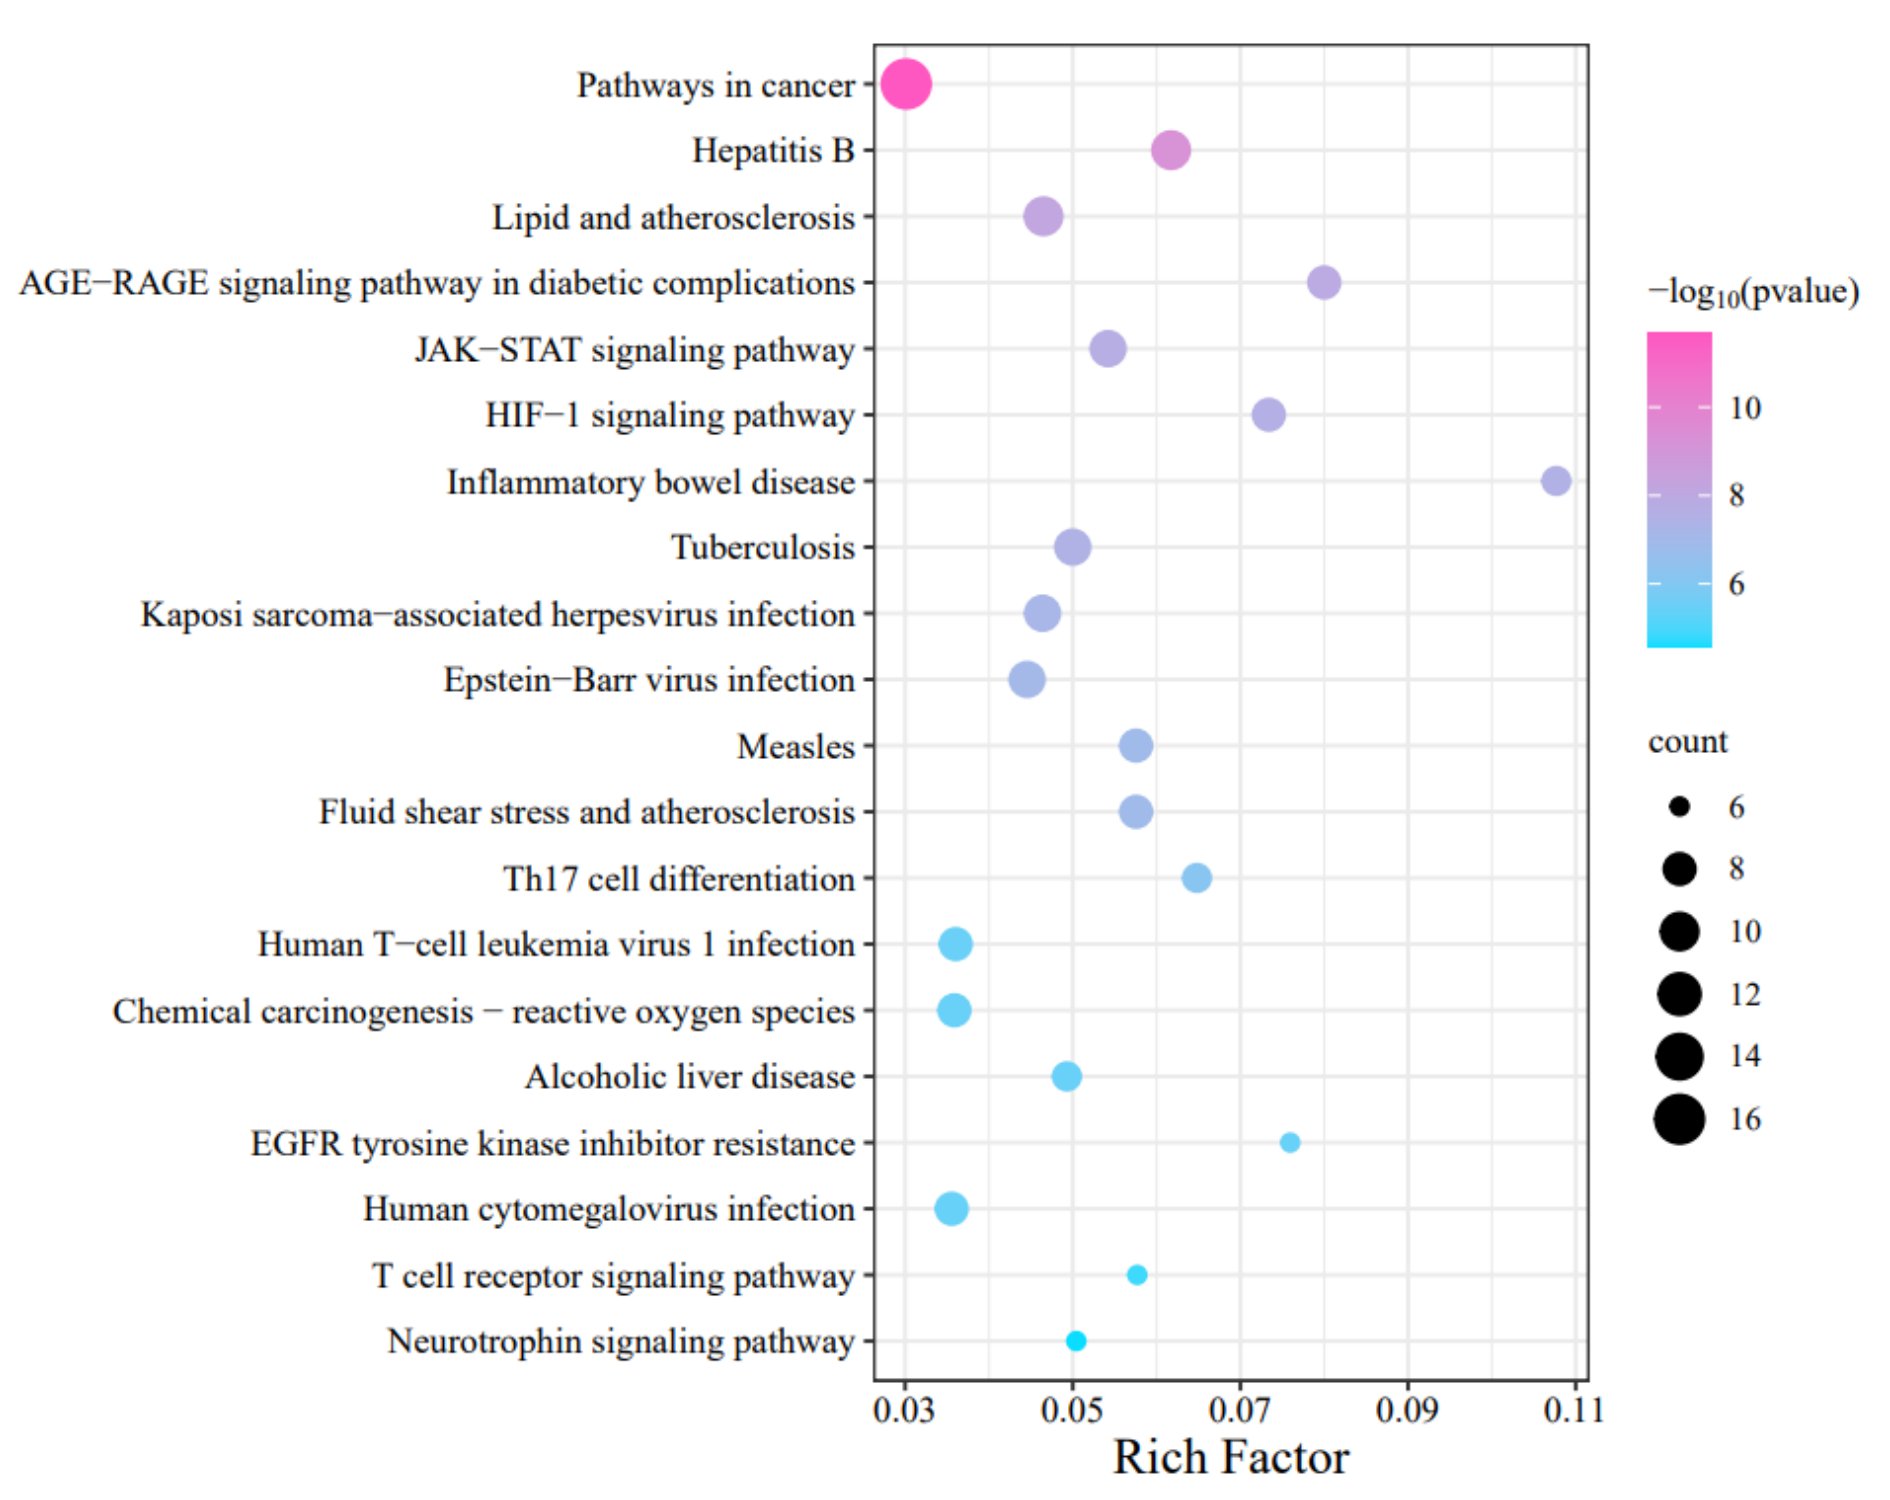


**Fig. S4**


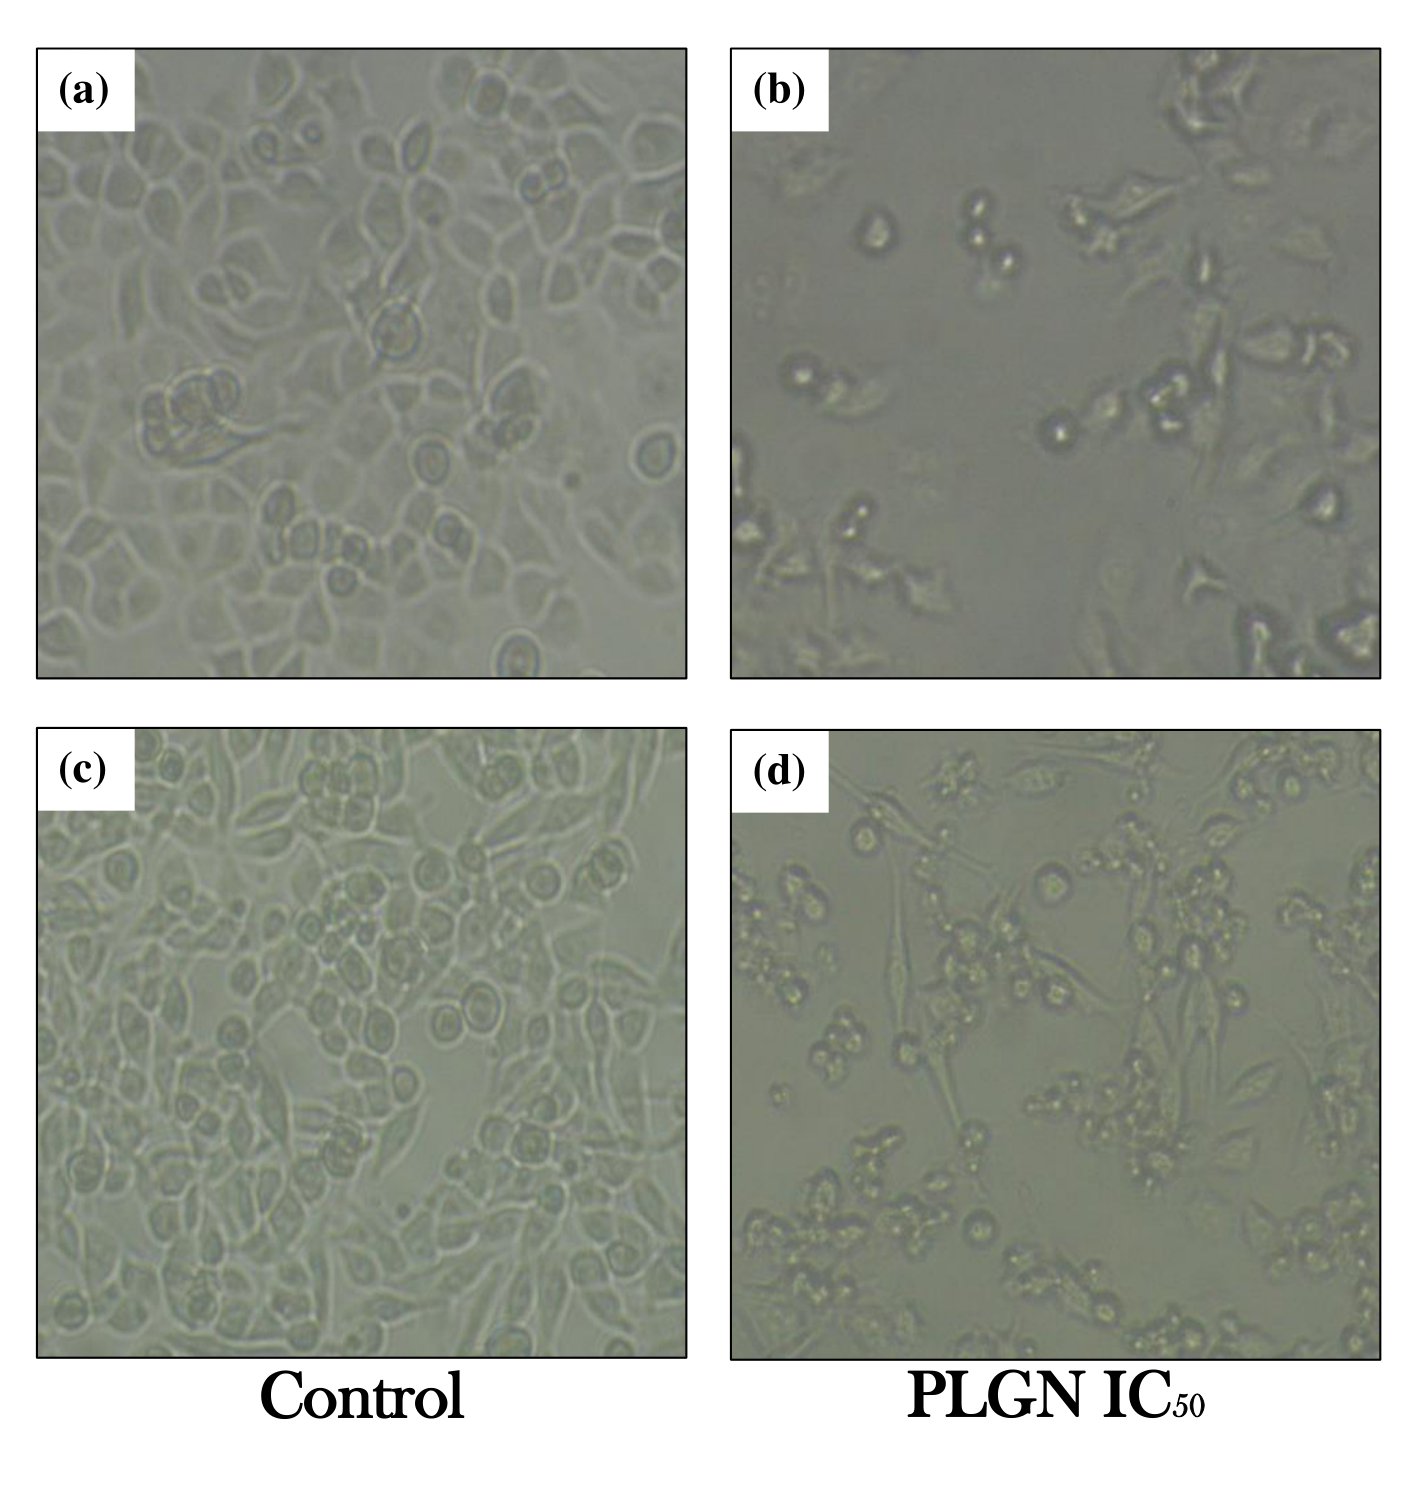


**Fig. S5**


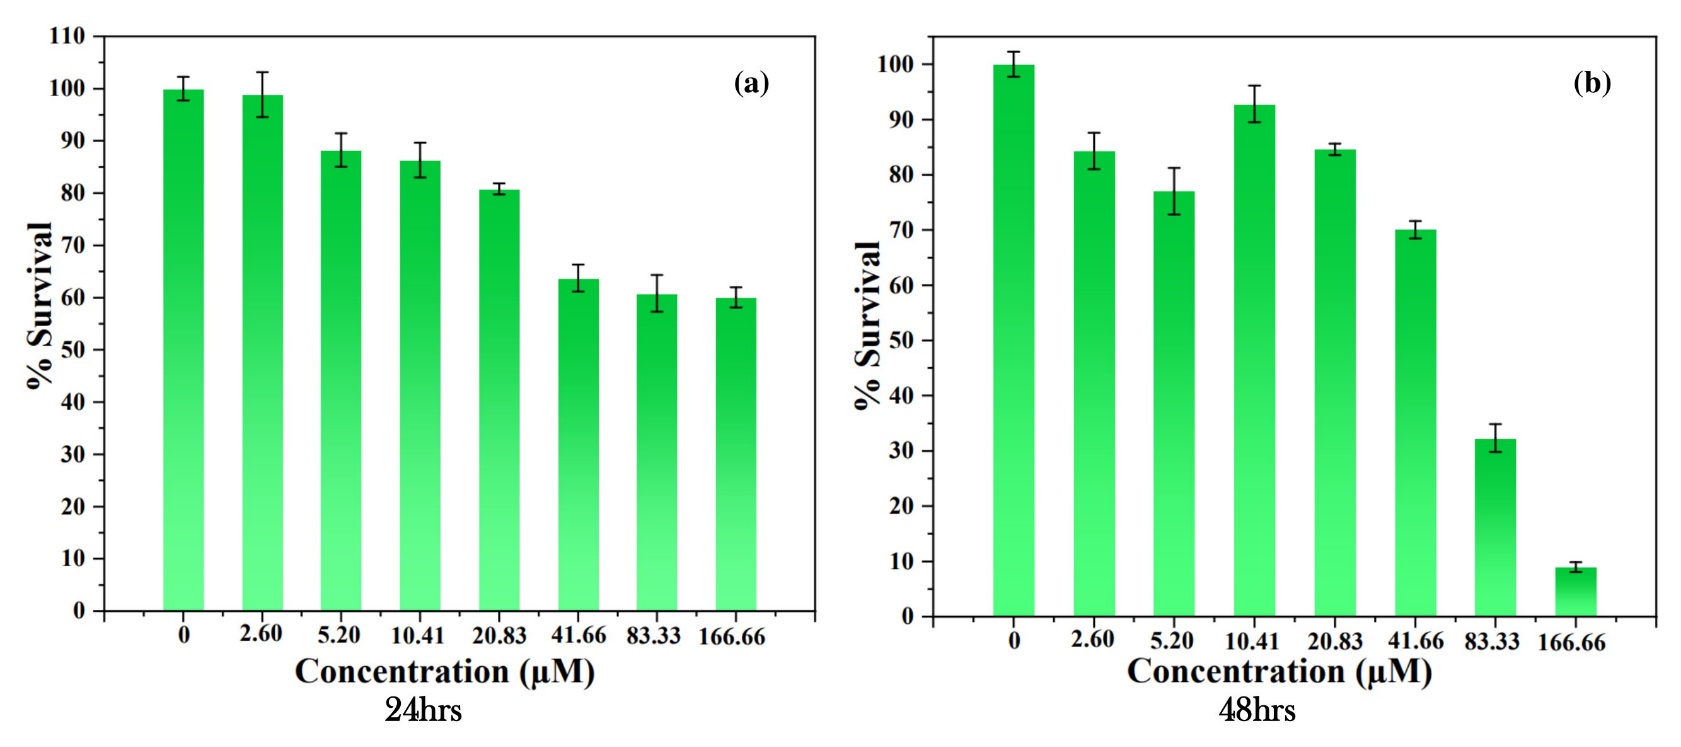

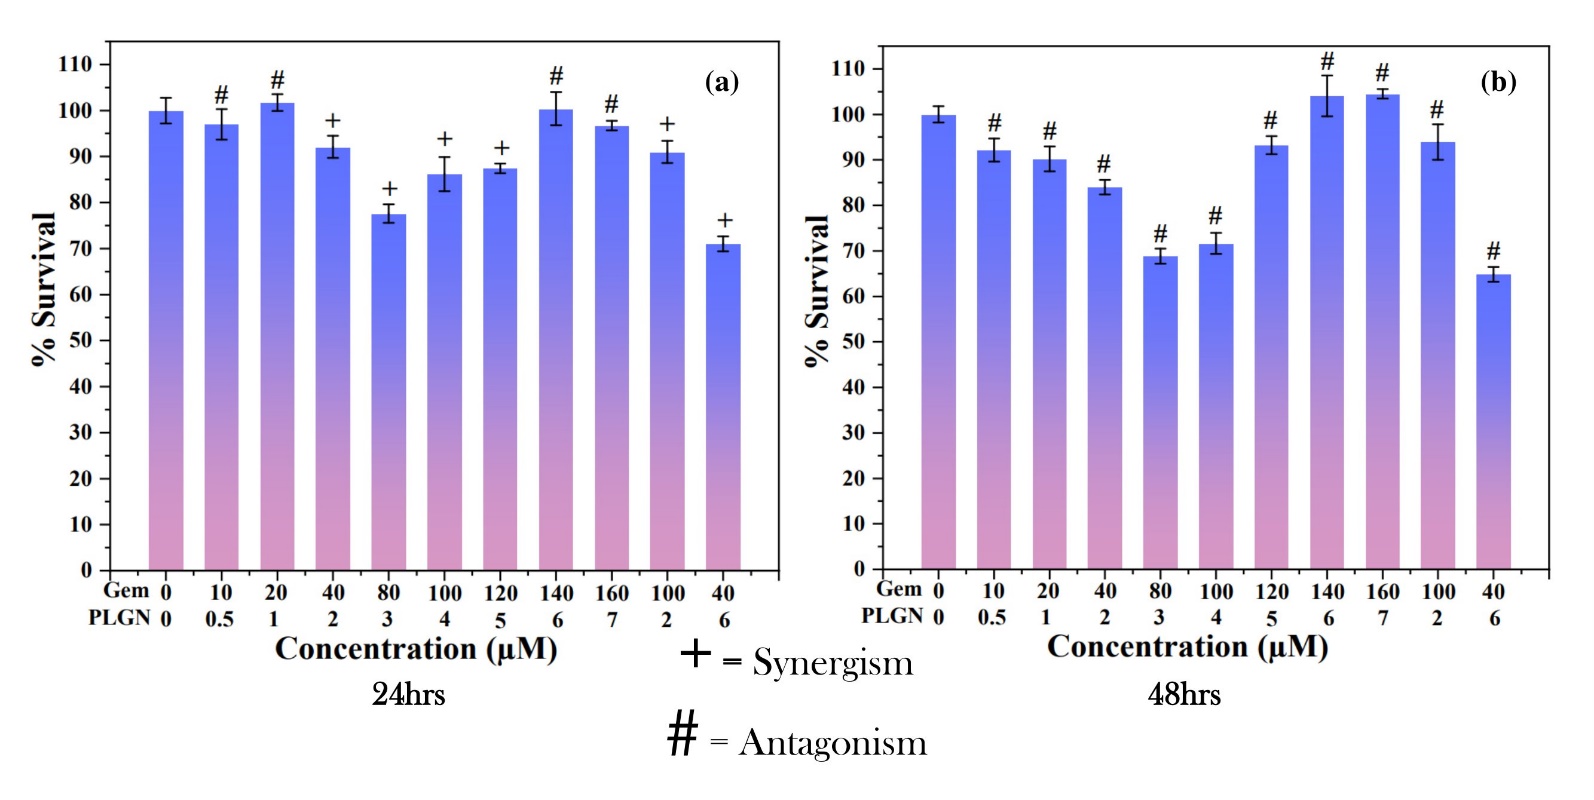


**Fig. S6**

**Fig. S7**


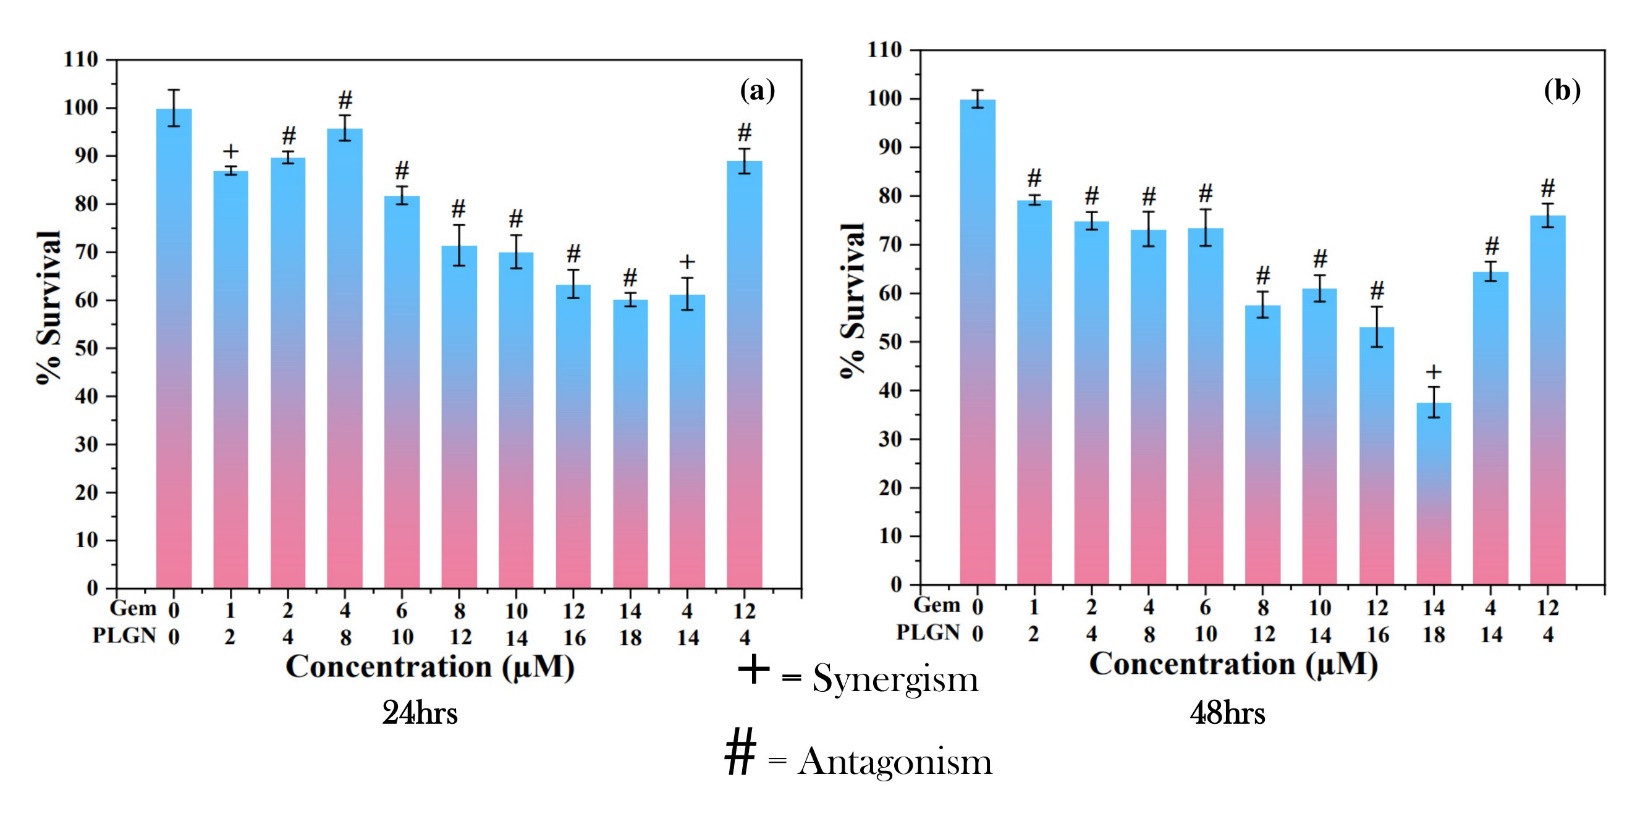


**Fig. S8**


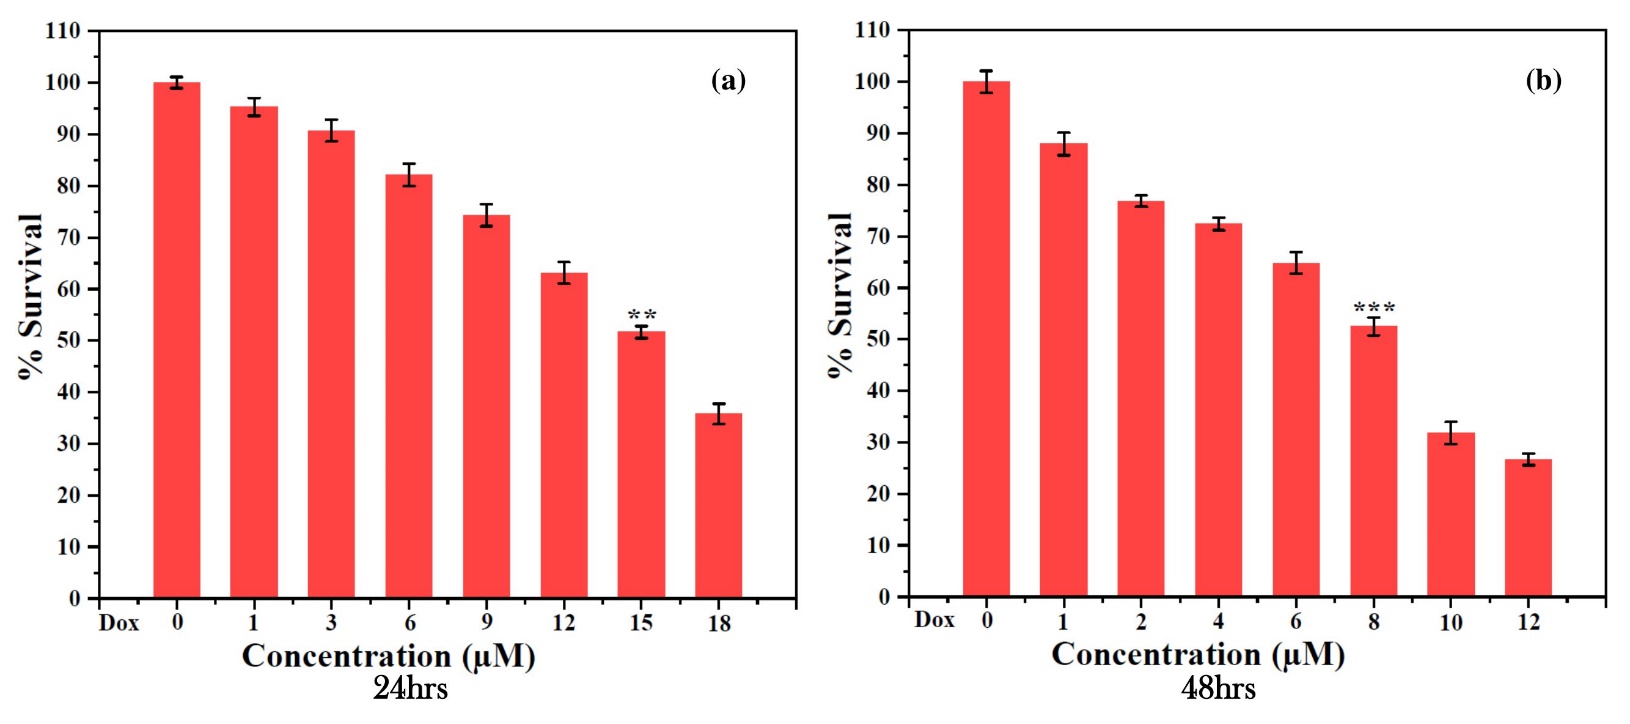


**Fig. S9**


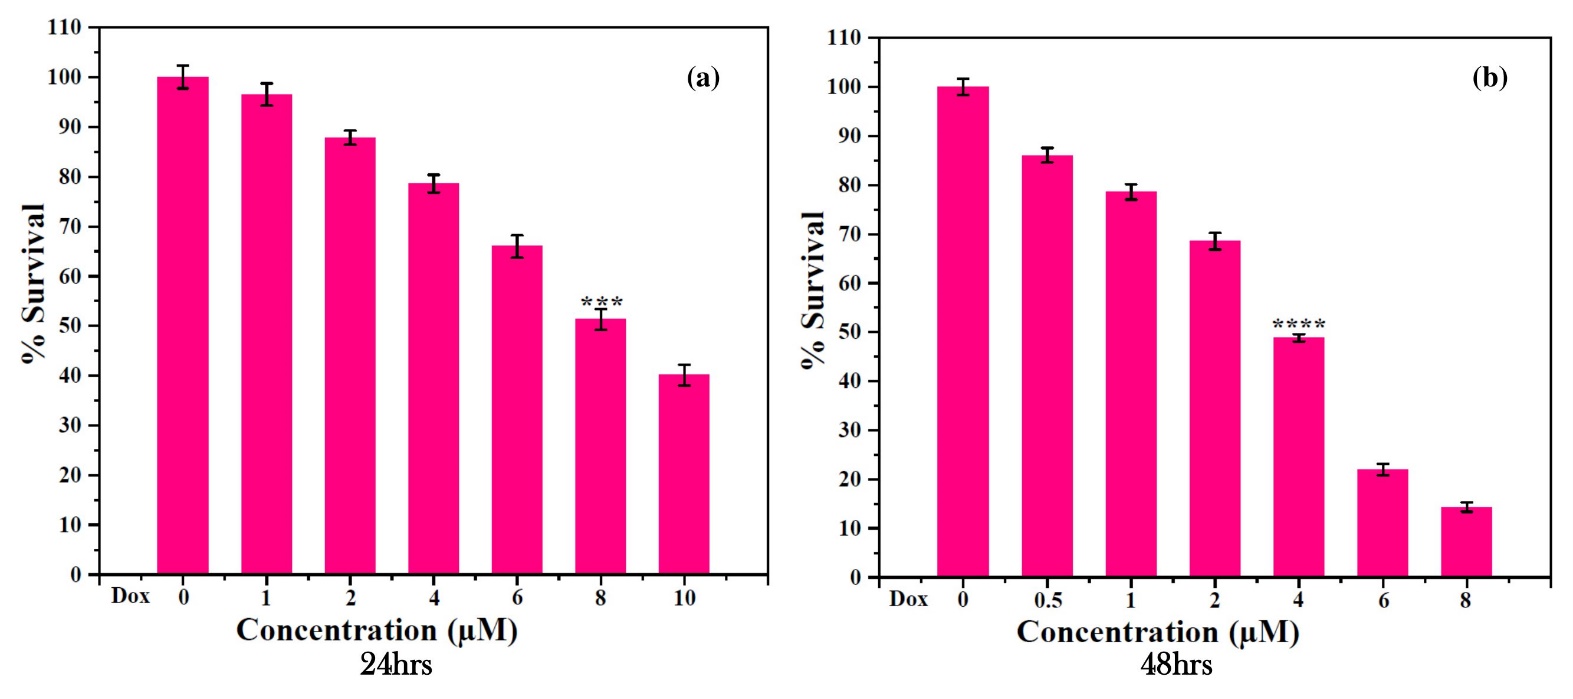

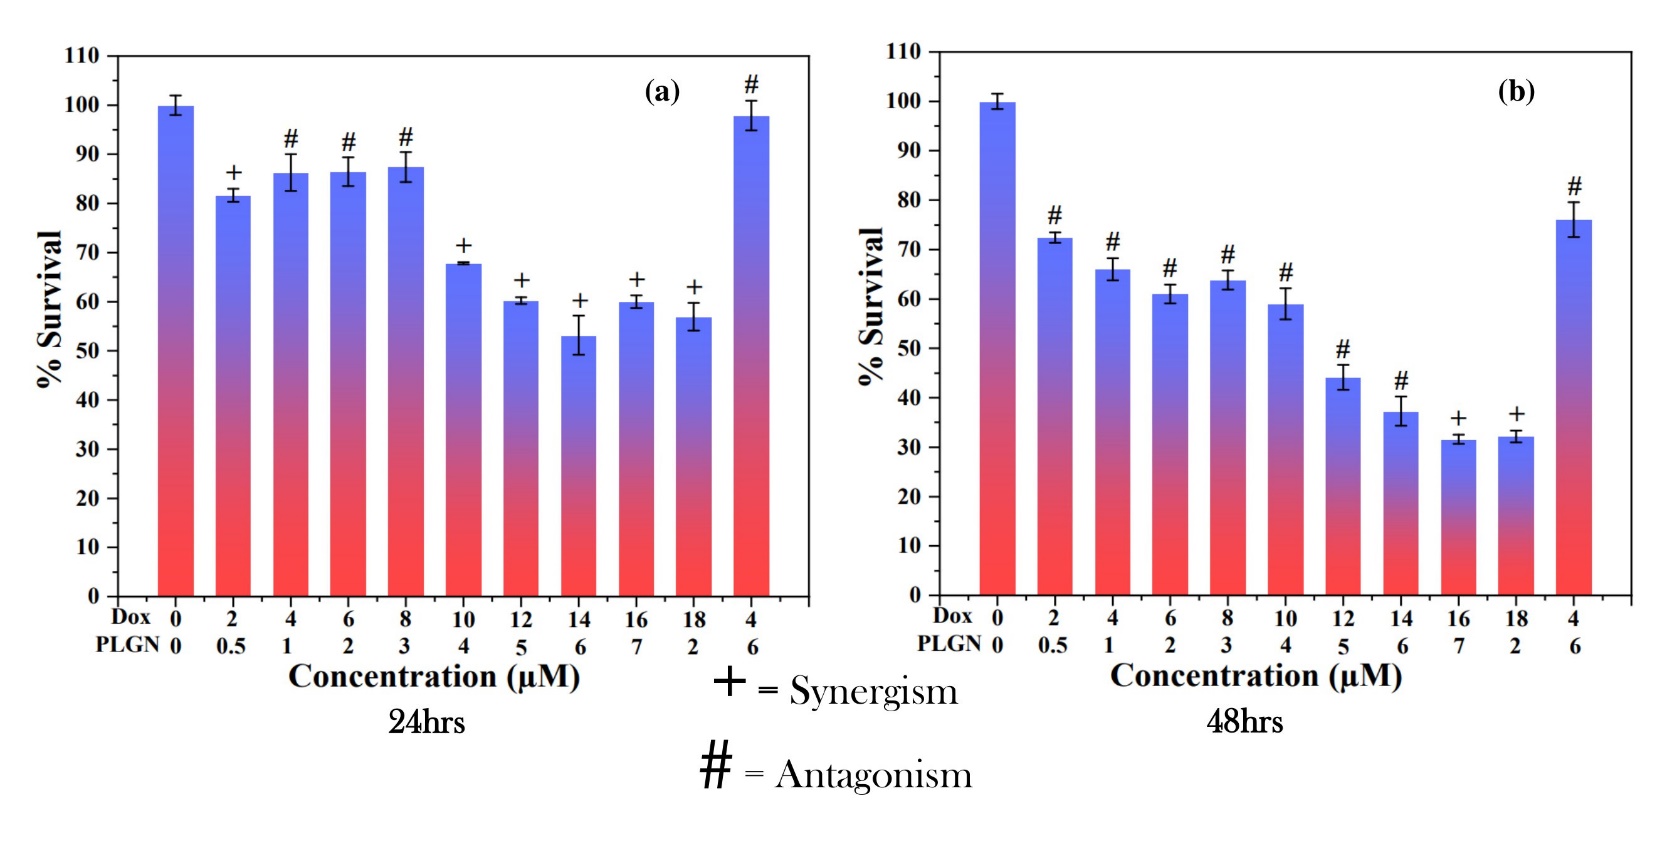


**Fig. S10**

**Fig. S11**


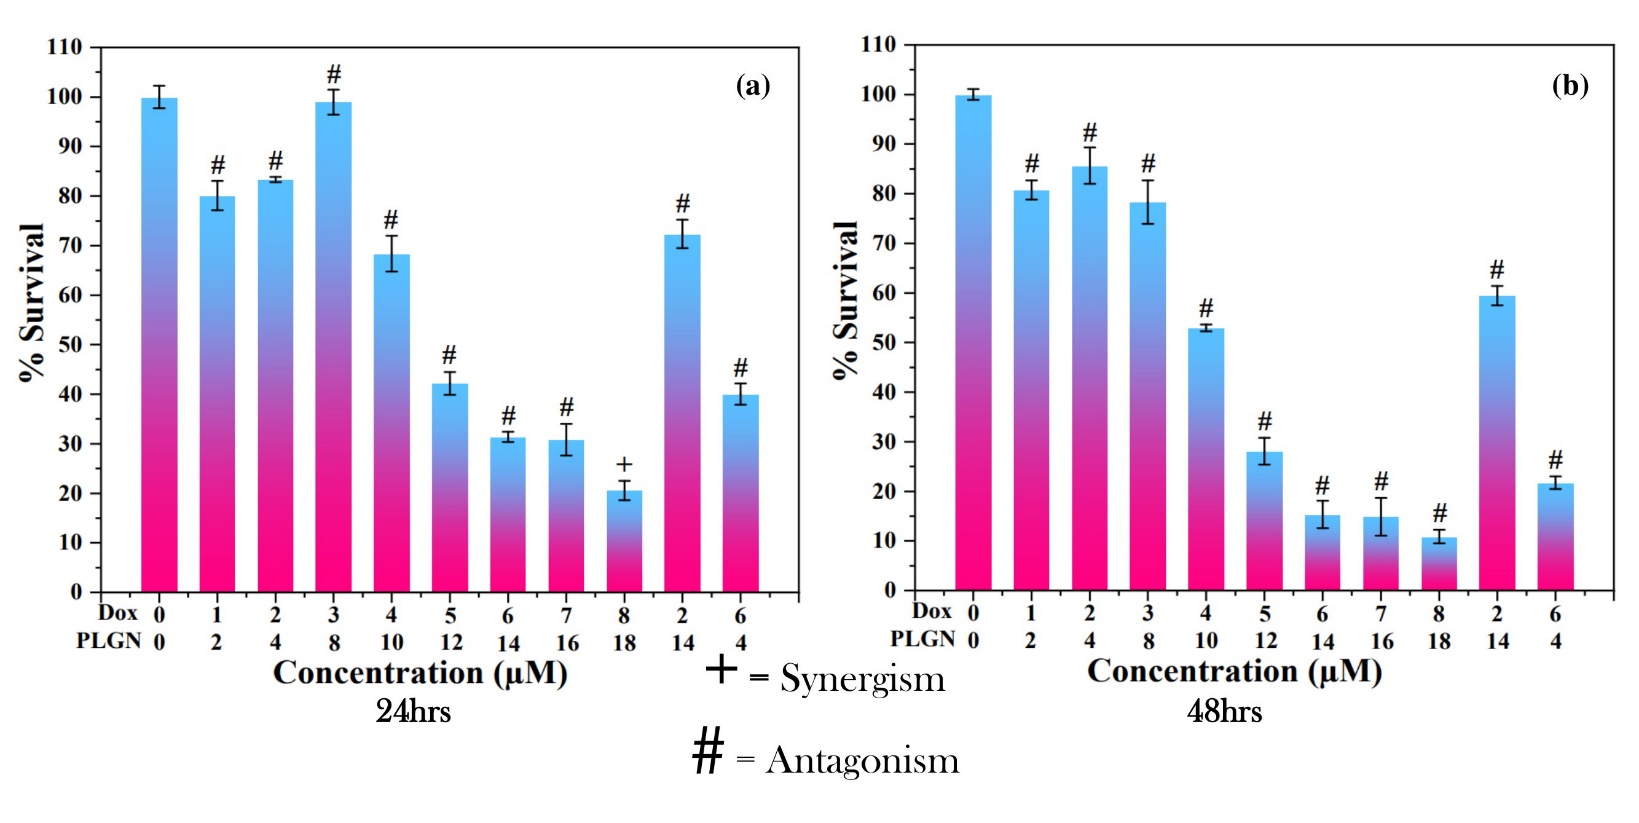

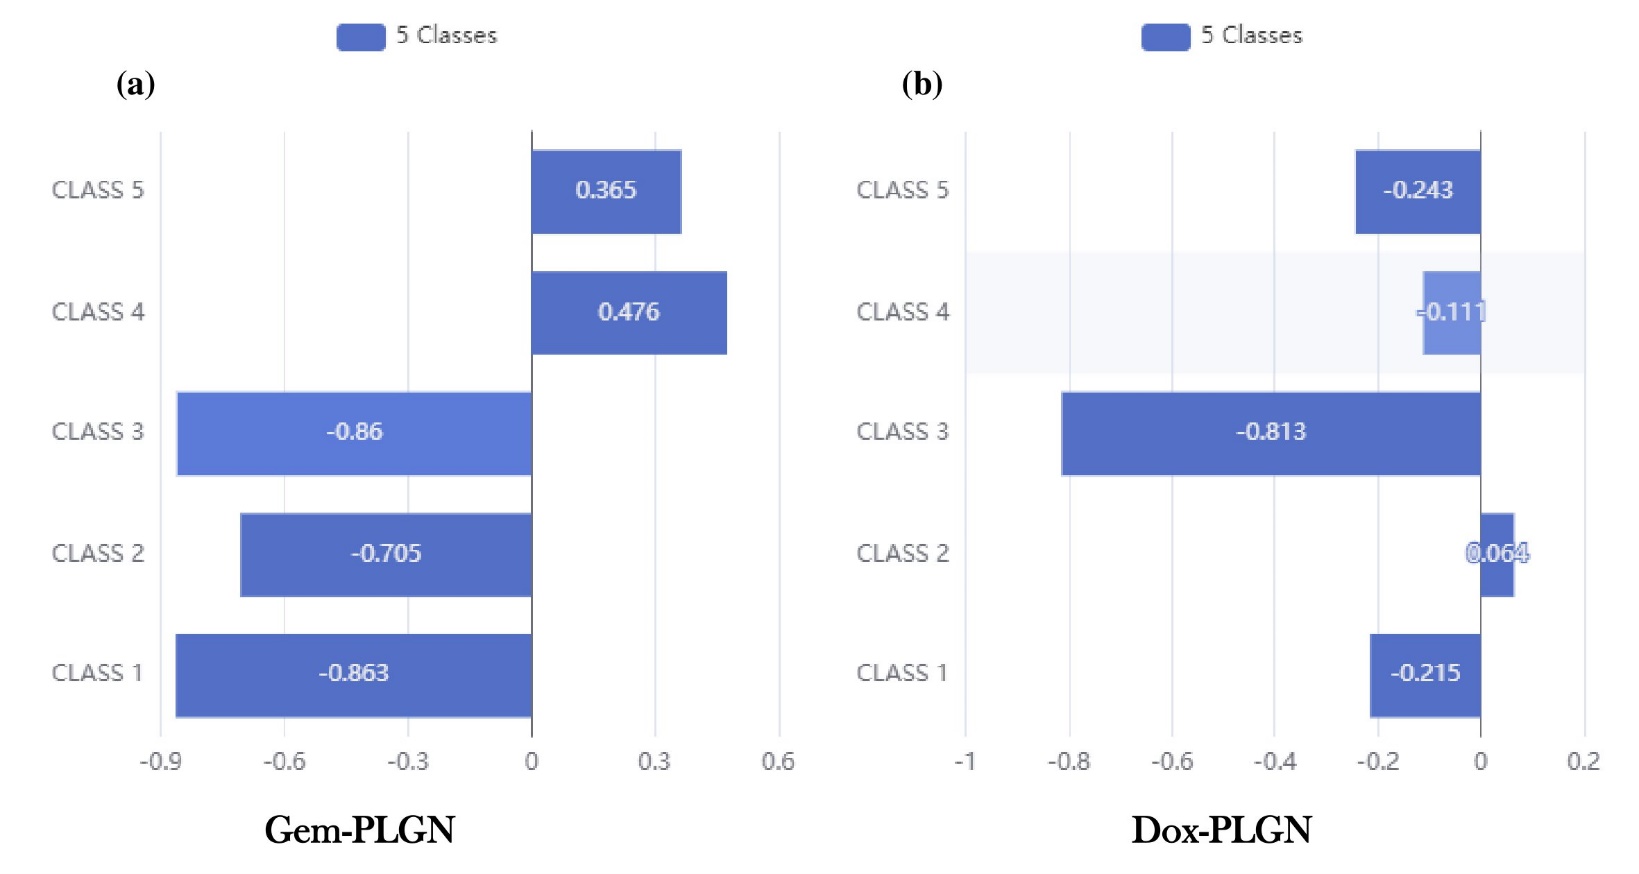


**Fig. S12**

**Fig. S13**


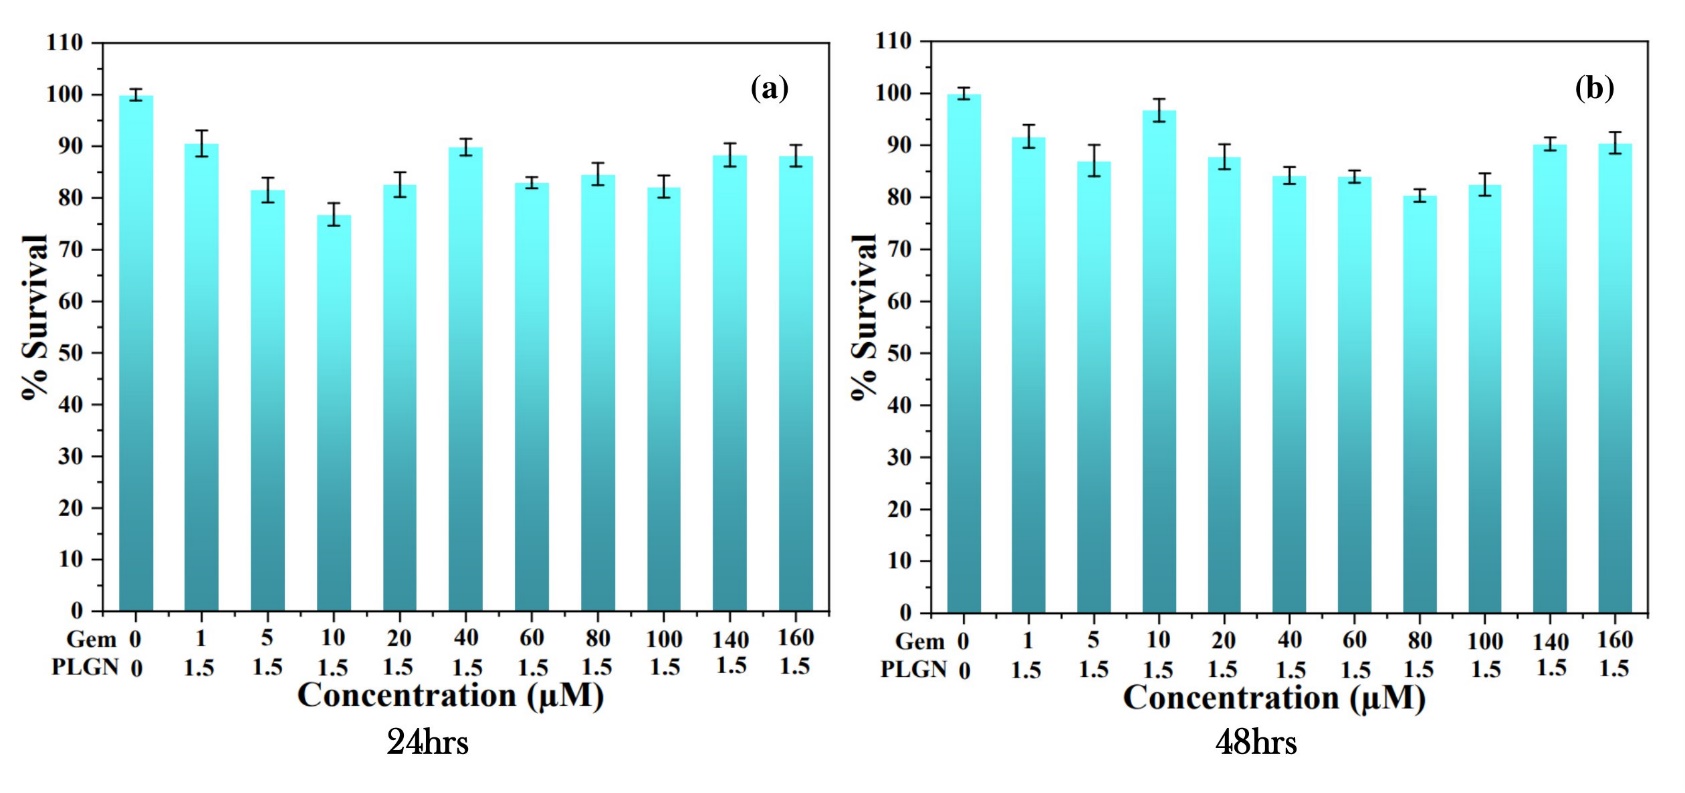

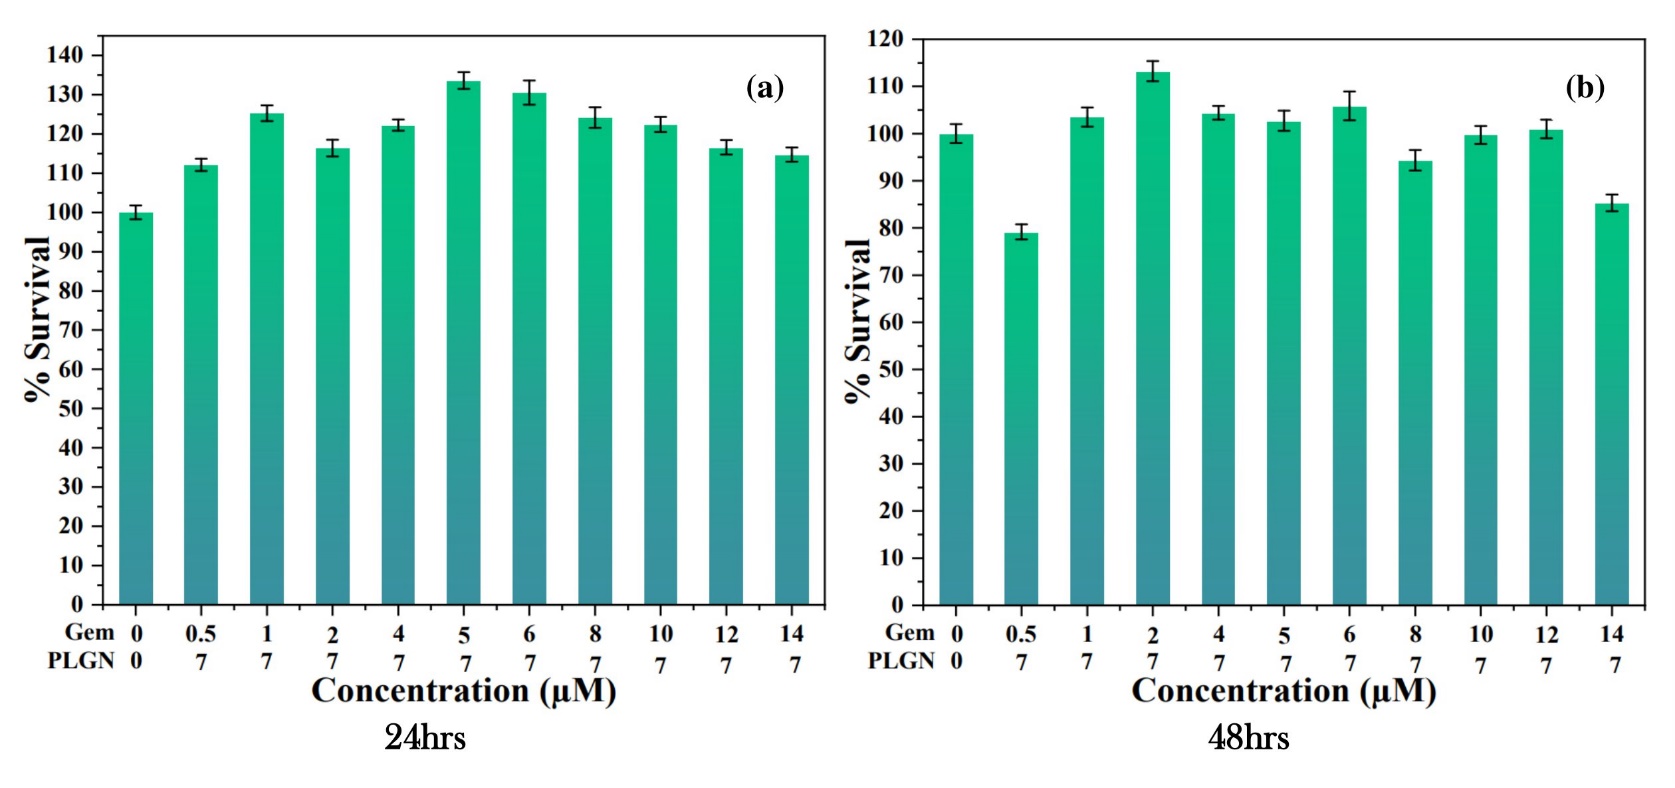


**Fig. S14**
