# Supplementary material for: Understanding cytotoxicity induction by plumbagin in pancreatic ductal adenocarcinoma using network pharmacology, bioinformatic and in-vitro study
Source: Research Square preprint supplement (doi:10.21203/rs.3.rs-8470677/v1), 2026-01-14
Supplement: Supplementary file 2 [file dda95890e3a2c8487a9de614.docx]

**Understanding cytotoxicity induction by plumbagin in pancreatic ductal adenocarcinoma using network pharmacology, bioinformatic and *in-vitro* study**

**(Running heading: Mechanistic role of Plumbagin in PDAC therapeutics)**

**JOURNAL- CYTOTECHNOLOGY**

**SUPPLEMENTARY TABLES**

**Table S1: Primer sequences.** Detailed sequence for forward and reverse primers of human genes used in qRT-PCR.

| **S. No** | **Primer** | **Sequence** |
| --- | --- | --- |
| **1** | β-actin_F | 5′-AGCACTGTGTTGGCGTACAG-3′ |
| **2** | β-actin_R | 5′-AGAGCTACGAGCTGCCTGAC-3′ |
| **3** | N-Cadherin_F | 5′-CGAATGGATGAAAGACCCATCC-3′ |
| **4** | N-Cadherin_R | 5′- GGAGCCACTGCCTTCATAGTCAA-3′ |
| **5** | Zeb2_F | 5′-CGCTTGACATCACTGAAGGA-3′ |
| **6** | Zeb2_R | 5′-CTTGCCACACTCTGTGCATT-3′ |
| **7** | p53_F | 5′-GGCCCACTTCACCGTACTAA-3′ |
| **8** | p53_R | 5′-GTGGTTTCAAGGCGAGATGT-3′ |
| **9** | EGFR F | 5’TGGCATCTTTAAGGGCTC3’ |
| **10** | EGFR R | 5’TGGCTAGTCGGTGTAAAC3’ |
| **11** | Pi3K F | 5’ATGGGGATGATTTACGGC 3’ |
| **12** | Pi3K R | 5’TCTCCTTTGTTCTTGTCT3’ |
| **13** | AKT F | 5’GTGCTGGAGGACAATGAC 3’ |
| **14** | AKT R | 5’AGCAGCCCTGAAAGCAAG 3’ |
| **15** | mTOR F | 5’TGGCTTCTAAGTCTACCA 3’ |
| **16** | mTOR R | 5’GAGGTCCTTGACATTCCC 3’ |

**Table S2: Targets of PLGN in *Homo sapiens*.** PLGN targets in humans identified from SwissTargetPrediction, SuperPred and PASS.

| **Targets of PLGN** | | | |
| --- | --- | --- | --- |
| TDP1 | MAPT | MAP2K7 | IL17A |
| CTSD | TP53 | PTPN22 | CXCR4 |
| TRIM24 | CDC25B | PKN1 | BAX |
| MAOA | STAT3 | STK32A | NFKB1 |
| CSNK2B | TRPA1 | STK38L | TXNRD1 |
| HDAC2 | CDC25A | VRK2 | NOX1 |
| NR1I2 | CYP1A2 | IL6 | CYBB |
| CDC25C | CYP2J2 | IL2 | EP300 |
| TOP2A | NEK6 | IFNG | IDO1 |
| CDK5 | CDK19 | IL4 | PIM1 |
| THRA | CDK13 | BCL2 | DUSP1 |
| SLC2A1 | PIP5K1C | SRC | GSR |
| GPBAR1 | CYP2B6 | NFE2L2 | MAOB |
| DUSP3 | CAMK4 | NOX4 | ERN1 |
| KLF5 | ACVR2B | AKT1 | BACE1 |
| APEX1 | PLEC | CYP2E1 |  |

**Table S3: Genes of PPI in PLGN and PDAC.** List of common genes between PLGN targets and PDAC affected genes analysed in FunRich.

| **Common genes of PLGN-PDAC** | | |
| --- | --- | --- |
| CTSD | MAP2K7 | AKT1 |
| HDAC2 | IL6 | CYP2E1 |
| NR1I2 | IL2 | IL17A |
| TOP2A | IFNG | CXCR4 |
| SLC2A1 | IL4 | BAX |
| APEX1 | BCL2 | NFKB1 |
| TP53 | SRC | EP300 |
| STAT3 | NFE2L2 | IDO1 |
| CYP1A2 | NOX4 | PIM1 |

**Table S4: Gene Ontology Analysis.** List of Gene Ontology terms and pathways derived from Biological Process, Cellular Components and Molecular Function that are significantly affected in PDAC due to PLGN.

| **Category** | **Pathway Description** | **-Log P** |
| --- | --- | --- |
| Biological Process | positive regulation of transcription, DNA-templated | 9.059966572 |
| positive regulation of transcription from RNA polymerase II promoter | 8.98892511 |
| positive regulation of apoptotic process | 8.081040787 |
| negative regulation of apoptotic process | 7.773324177 |
| inflammatory response | 7.344784462 |
| apoptotic process | 7.266400202 |
| positive regulation of tyrosine phosphorylation of STAT protein | 5.679164017 |
| cellular response to hydrogen peroxide | 5.556974093 |
| positive regulation of gene expression | 5.357071724 |
| positive regulation of tumor necrosis factor production | 4.902273483 |
| Cellular Components | transcription factor complex | 3.698858154 |
| cytoplasm | 3.605834195 |
| nucleoplasm | 3.394027453 |
| macromolecular complex | 2.779702866 |
| mitochondrion | 2.768032792 |
| nucleus | 2.648929249 |
| chromatin | 2.021120755 |
| cytosol | 2.009554183 |
| pore complex | 1.78769223 |
| extracellular region | 1.337198195 |
| Molecular Function | enzyme binding | 7.463125957 |
| heme binding | 4.281595379 |
| RNA polymerase II sequence-specific DNA binding transcription factor binding | 3.923582306 |
| cytokine activity | 3.888335752 |
| transcription factor binding | 3.746720868 |
| NF-kappa B binding | 3.029108119 |
| protein phosphatase 2A binding | 2.97795892 |
| protein heterodimerization activity | 2.797081025 |
| protein binding | 2.592101996 |
| protein homodimerization activity | 2.576261864 |

**Table S5: KEGG Pathway Analysis.** Enriched KEGG pathways of interacting proteins between PLGN and PDAC.

| **KEGG Pathways** | **Rich Factor** | **No of Genes of Interest present in the pathway** | **P value** |
| --- | --- | --- | --- |
| Pathways in cancer | 0.030131827 | 16 | 2.16E-12 |
| Hepatitis B | 0.061728395 | 10 | 5.69E-10 |
| Lipid and atherosclerosis | 0.046511628 | 10 | 7.00E-09 |
| AGE-RAGE signaling pathway in diabetic complications | 0.08 | 8 | 1.30E-08 |
| JAK-STAT signaling pathway | 0.054216867 | 9 | 1.91E-08 |
| HIF-1 signaling pathway | 0.073394495 | 8 | 2.37E-08 |
| Inflammatory bowel disease | 0.107692308 | 7 | 3.07E-08 |
| Tuberculosis | 0.05 | 9 | 3.61E-08 |
| Kaposi sarcoma-associated herpesvirus infection | 0.046391753 | 9 | 6.48E-08 |
| Epstein-Barr virus infection | 0.044554455 | 9 | 8.87E-08 |
| Measles | 0.057553957 | 8 | 1.28E-07 |
| Fluid shear stress and atherosclerosis | 0.057553957 | 8 | 1.28E-07 |
| Th17 cell differentiation | 0.064814815 | 7 | 6.54E-07 |
| Human T-cell leukemia virus 1 infection | 0.036036036 | 8 | 3.06E-06 |
| Chemical carcinogenesis - reactive oxygen species | 0.035874439 | 8 | 3.16E-06 |
| Alcoholic liver disease | 0.049295775 | 7 | 3.26E-06 |
| EGFR tyrosine kinase inhibitor resistance | 0.075949367 | 6 | 3.33E-06 |
| Human cytomegalovirus infection | 0.035555556 | 8 | 3.35E-06 |
| T cell receptor signaling pathway | 0.057692308 | 6 | 1.29E-05 |
| Neurotrophin signaling pathway | 0.050420168 | 6 | 2.48E-05 |

**TableS6: Network Analyser.** List of top predicted targets of PLGN in human PDAC obtained using network analyser.

| **Display name** | **Degree** | **Average Shortest Path Length** | **Betweenness Centrality** | **Closeness Centrality** | **Clustering Coefficient** |
| --- | --- | --- | --- | --- | --- |
| STAT3 | 15 | 1.576923 | 0.280095 | 0.634146 | 0.295238 |
| TP53 | 14 | 1.5 | 0.362586 | 0.666667 | 0.230769 |
| AKT1 | 13 | 1.653846 | 0.191443 | 0.604651 | 0.294872 |
| EP300 | 10 | 1.769231 | 0.111267 | 0.565217 | 0.422222 |
| IL6 | 8 | 1.884615 | 0.052586 | 0.530612 | 0.571429 |
| IL2 | 6 | 2.192308 | 0.011165 | 0.45614 | 0.8 |
| NFKB1 | 6 | 1.961538 | 0.005641 | 0.509804 | 0.666667 |
| SRC | 6 | 1.807692 | 0.073641 | 0.553191 | 0.666667 |
| BCL2 | 5 | 1.961538 | 0.002857 | 0.509804 | 0.9 |
| IL4 | 5 | 2.384615 | 0 | 0.419355 | 1 |
| IFNG | 5 | 2.384615 | 0 | 0.419355 | 1 |
| IL17A | 5 | 2.384615 | 0 | 0.419355 | 1 |
| BAX | 4 | 2.153846 | 0 | 0.464286 | 1 |
| HDAC2 | 4 | 2.038462 | 0.001026 | 0.490566 | 0.833333 |
| NR1I2 | 4 | 2.153846 | 0.212308 | 0.464286 | 0.333333 |
| CYP1A2 | 3 | 3 | 0.076923 | 0.333333 | 0.333333 |
| CYP2E1 | 2 | 3.038462 | 0 | 0.329114 | 1 |
| NFE2L2 | 2 | 2.269231 | 0 | 0.440678 | 1 |
| SLC2A1 | 2 | 2.269231 | 0 | 0.440678 | 1 |
| APEX1 | 2 | 2.346154 | 0 | 0.42623 | 1 |
| MAP2K7 | 2 | 2.153846 | 0 | 0.464286 | 1 |
| CXCR4 | 2 | 2.346154 | 0 | 0.42623 | 1 |

**Table S7: Combination Index (CI).** CI values after treatment with combination of Gemcitabine and PLGN in PDAC cells. CI < 1.0 represents synergism, CI = 1.0 represents an additive, and CI >1.0 represents antagonism.

| **Drug on Panc-1** | **Combination Index** | | **Drug on Mia-PaCa-2** | **Combination Index** | |
| --- | --- | --- | --- | --- | --- |
|  | **24hrs** | **48hrs** |  | **24hrs** | **48hrs** |
| **Gemcitabine (10 µM) + PLGN (0.5 µM)** | 2.81 | 3670.81 | **Gemcitabine (1 µM) + PLGN (2 µM)** | 0.90 | 1.52 |
| **Gemcitabine (20 µM) + PLGN (1 µM)** | 2785.99 | 28.12 | **Gemcitabine (2 µM) + PLGN (4 µM)** | 2.89 | 1.78 |
| **Gemcitabine (40 µM) + PLGN (2 µM)** | 0.78 | 3.21 | **Gemcitabine (4 µM) + PLGN (8 µM)** | 26.79 | 3.23 |
| **Gemcitabine (80 µM) + PLGN (3 µM)** | 0.04 | 400.50 | **Gemcitabine (6 µM) + PLGN (10 µM)** | 2.70 | 4.43 |
| **Gemcitabine (100 µM) + PLGN (4 µM)** | 0.27 | 262.12 | **Gemcitabine (8 µM) + PLGN (12 µM)** | 1.38 | 1.45 |
| **Gemcitabine (120 µM) + PLGN (5 µM)** | 0.42 | 975.19 | **Gemcitabine (10 µM) + PLGN (14 µM)** | 1.53 | 2.38 |
| **Gemcitabine (140 µM) + PLGN (6 µM)** | 19468.2 | 8.01 | **Gemcitabine (12 µM) + PLGN (16 µM)** | 1.09 | 1.51 |
| **Gemcitabine (160 µM) + PLGN (7 µM)** | 43.78 | 9.35 | **Gemcitabine (14 µM) + PLGN (18 µM)** | 1.02 | 0.52 |
| **Gemcitabine (100 µM) + PLGN (2 µM)** | 0.78 | 390.07 | **Gemcitabine (4 µM) + PLGN (14 µM)** | 0.65 | 2.12 |
| **Gemcitabine (40 µM) + PLGN (6 µM)** | 0.04 | 452.48 | **Gemcitabine (12 µM) + PLGN (4 µM)** | 9.30 | 7.82 |

| **Drug on Panc-1** | **Combination Index** | | **Drug on Mia-PaCa-2** | **Combination Index** | |
| --- | --- | --- | --- | --- | --- |
|  | **24hrs** | **48hrs** |  | **24hrs** | **48hrs** |
| **Doxorubicin (2 µM) + PLGN (0.5 µM)** | 0.83 | 2.08 | **Doxorubicin (1 µM) + PLGN (2 µM)** | 1.10 | 1.54 |
| **Doxorubicin (4 µM) + PLGN (1 µM)** | 7.30 | 2.25 | **Doxorubicin (2 µM) + PLGN (4 µM)** | 2.62 | 3.89 |
| **Doxorubicin (6 µM) + PLGN (2 µM)** | 14.16 | 2.54 | **Doxorubicin (3 µM) + PLGN (8 µM)** | 42.57 | 5.08 |
| **Doxorubicin (8 µM) + PLGN (3 µM)** | 31.36 | 4.38 | **Doxorubicin (4 µM) + PLGN (10 µM)** | 2.87 | 2.94 |
| **Doxorubicin (10 µM) + PLGN (4 µM)** | 0.89 | 3.97 | **Doxorubicin (5 µM) + PLGN (12 µM)** | 1.42 | 1.85 |
| **Doxorubicin (12 µM) + PLGN (5 µM)** | 0.73 | 1.53 | **Doxorubicin (6 µM) + PLGN (14 µM)** | 1.14 | 1.34 |
| **Doxorubicin (14 µM) + PLGN (6 µM)** | 0.64 | 1.12 | **Doxorubicin (7 µM) + PLGN (16 µM)** | 1.28 | 1.47 |
| **Doxorubicin (16 µM) + PLGN (7 µM)** | 0.98 | 0.86 | **Doxorubicin (8 µM) + PLGN (18 µM)** | 0.95 | 1.32 |
| **Doxorubicin (18 µM) + PLGN (2 µM)** | 0.91 | 0.87 | **Doxorubicin (2 µM) + PLGN (14 µM)** | 3.45 | 3.60 |
| **Doxorubicin (4 µM) + PLGN (6 µM)** | 147296.0 | 32.81 | **Doxorubicin (6 µM) + PLGN (4 µM)** | 1.10 | 1.18 |

**Table S8: Combination Index (CI).** CI values after treatment with combination of Doxorubicin and PLGN in PDAC cells. CI < 1.0 represents synergism, CI = 1.0 represents an additive, and CI >1.0 represents antagonism.
